# Supplementary material for: Leveraging protein language models for accurate multiple sequence alignments
Source: HighWire-hosted journal article supplement (doi:10.1101/gr.277675.123), 2023-07-06
Supplement: Supplemental_Methods_References_.docx [file Supplemental_Methods_References_.docx]

**SUPPLEMENTAL METHODS**

**Sequence clustering and outlier detection**

We build a network where there is a node for each sequence and edge weights between nodes correspond to the cosine similarities of their sequence-level embeddings and then cluster this network with the function from the python-igraph package, which finds densely connected neighborhoods using random walks [(Csardi and Nepusz, 2006)](https://www.zotero.org/google-docs/?3DeZ3n). To remove outlier sequences, we sum the total cosine similarity of each sequence to the other sequences in its cluster. If a sequence has a z-score of less than -5 relative to the total cosine similarity of each of the other sequences, we remove it from the cluster and exclude it from the vcMSA alignment process.

**Amino acid clustering**

To cluster sets of amino acids, we first simply extract individual connected components of the RBH network. If a connected component contains at most one amino acid from each sequence, and contains amino acids from over half the sequences, we align these amino acids to each other. In subsequent iterations of vcMSA, if a connected component contains more than one amino acid from the same sequence, we either remove the more weakly connected amino acid, or for larger connected sets, apply walktrap clustering to break it into smaller clusters. In early iterations, we discard small natural clusters, however we reduce this minimum cluster size requirement over subsequent iterations, until clusters of size two are permitted. Finally, amino acids which are not placed in any cluster are placed in clusters of size one.

**Adding amino acids to existing clusters**

During the second phase of the limited scope search, we add unsorted amino acids to existing clusters/columns. For example, in Figure 1F, the limited scope of the unsorted G, V, and S in sequence 3 includes the open position in cluster 3.

If an unsorted amino acid has a mean cosine similarity to an in-scope cluster’s amino acids greater than a threshold T (set to 0.5 in our experiments), that amino acid is added to the cluster.

**Reducing sequence-specific effects between sequences**

Correcting sequence-specific effects of amino acid embeddings is performed with pyComBat [(Johnson et al. 2007; Behdenna et al. 2021)](https://www.zotero.org/google-docs/?8mZF6M). Here, each sequence is analogous to a batch, and amino acid embeddings are analogous to samples within that batch. These sequence-specific effects present as separate clusters of amino acid embeddings for the same protein, visible through PCA (**Supplemental Figure 1C**). Briefly, ComBat removes sequence-specific effects between sequence batches using an empirical Bayes framework. For scalability, we use the first sequence in each sequence cluster as the reference batch [(Zhang et al. 2018)](https://www.zotero.org/google-docs/?X0pyiC) to which the embeddings of all other sequences will be adjusted towards.

References

Behdenna A, Haziza J, Azencott C-A, Nordor A. 2021. pyComBat, a Python tool for batch effects correction in high-throughput molecular data using empirical Bayes methods. bioRxiv doi:10.1101/2020.03.17.995431

Csardi G, Nepusz T. 2006. The igraph software package for complex network. Q5 research. Int J Complex Syst 1695: 1–9.

Johnson WE, Li C, Rabinovic A. 2007. Adjusting batch effects in microarray expression data using empirical Bayes methods. Biostatistics 8: 118–127. doi:10.1093/biostatistics/kxj037

Zhang Y, Jenkins DF, Manimaran S, Johnson WE. 2018. Alternative empirical Bayes models for adjusting for batch effects in genomic studies. BMC Bioinformatics 19: 262. doi:10.1186/s12859-018-2263-6
